# Supplementary material for: Genome and Transcriptome Analysis to Elucidate the Biocontrol Mechanism of Bacillus amyloliquefaciens XJ5 against Alternaria solani
Source: MDPI journal article supplement (doi:10.3390/microorganisms11082055), 2023-08-10
Supplement: s1 [file s1]

# Supplementary Information: Genome and Transcriptome Analysis to Elucidate the Biocontrol Mechanism of *Bacillus amyloliquefaciens* XJ5 against *Alternaria solani*

Fan Mu, Xu Chen, Zhenxin Fu, Xue Wang, Jiexin Guo, Xiaojun Zhao and Baojun Zhang \*

Shanxi Key Laboratory of Integrated Pest Management in Agriculture, College of Plant Protection, Shanxi Agricultural University, Jinzhong 030801, China; fanmu1993@126.com (F.M.); cx15294780353@163.com (X.C.); s20212327@stu.sxau.edu.cn (Z.F.); 17866709612@163.com (X.W.); 15234483340@163.com (J.G.); zhaoxiaojun0218@163.com (X.Z.)

\* Correspondence: sxauzjbj@sxau.edu.cn; Tel: +86-0354-628-5015

**Figure S1.** KEGG annotation classification (A) and enzymes annotation in the CAZy database (B) of *B. amyloliquefaciens* XJ5.

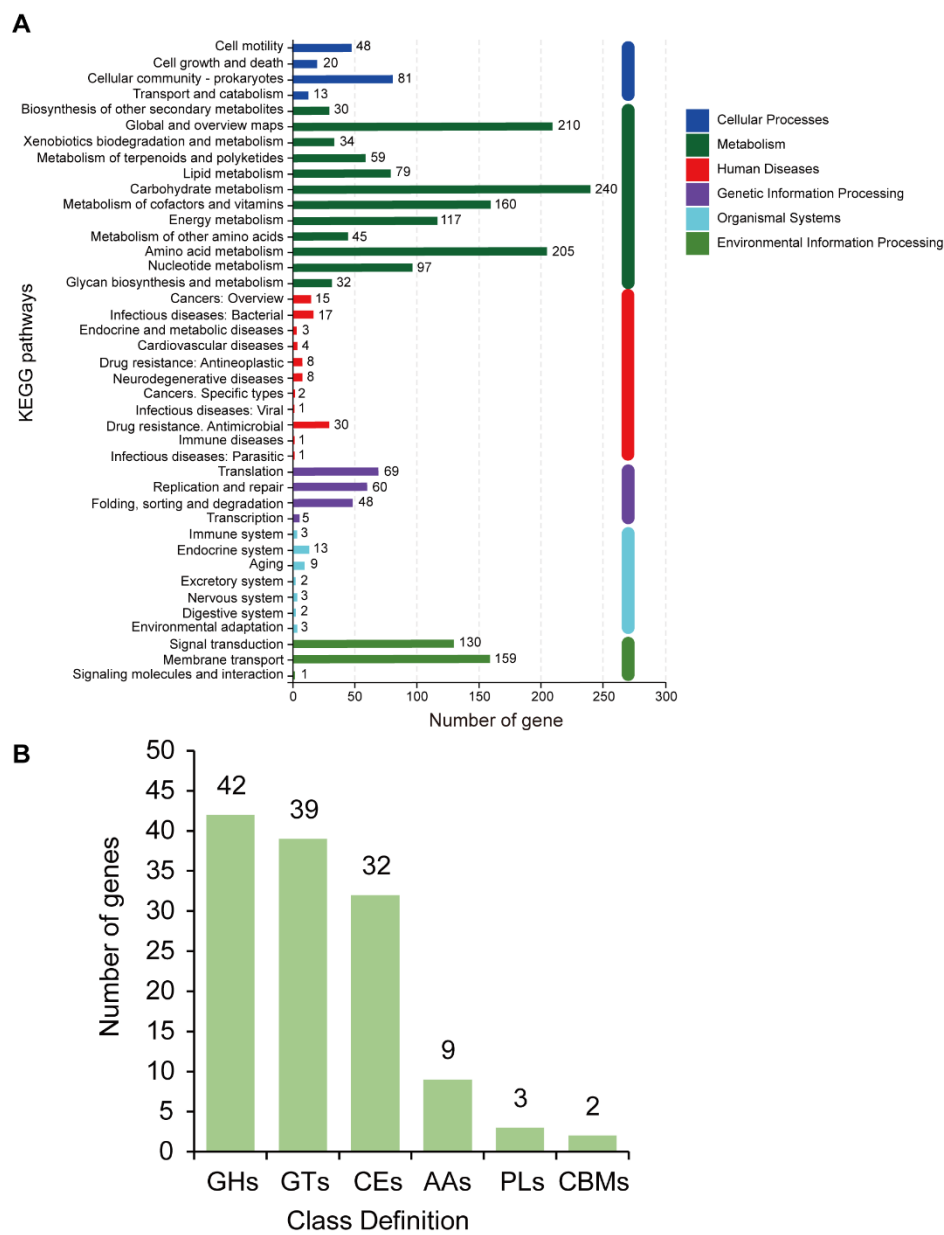

**Table S1.** Primers used for qRT-PCR.

| Gene ID                   | Primer sequence (5' to 3') |
|---------------------------|----------------------------|
| Actin (CC77DRAFT_1021406) | F: GACATGGCTGGTCGTGAT      |
|                           | R: AGTGGTGGAGAAGGTGTAAC    |
| CC77DRAFT_1056386         | F: AAGCCGATGTCGTTAGCCT     |
|                           | R: TCGTCCAAATCCAGACTCCT    |
| CC77DRAFT_1015889         | F: GTCAACTGCGGGTGGTCA      |
|                           | R: GTATGCGCTGCACGTATCG     |
| CC77DRAFT_752966          | F: AACCGCGTCGTAAGCATCCT    |
|                           | R: TCGCACAGTATCGCCAGTCT    |
| CC77DRAFT_1061421         | F: GACAACACCACCGCCTTACC    |
|                           | R: CCACTGGCGTTGATGAGCT     |
| CC77DRAFT_1032488         | F: CCATAACTGGCGTCTCATCTAC  |
|                           | R: TCAATCTGACTCCTATTCTGC   |
| CC77DRAFT_1032980         | F: CACGATGGGAATACCGCAAG    |
|                           | R: GGATCATGGAGGTGACGAACG   |
| CC77DRAFT_973065          | F: TCTCGGGATACCGTGCCATT    |
|                           | R: CGCTTGTTTCGCCTTCTTCGT   |
| CC77DRAFT_1067874         | F: CATTATCGGCTGCAGTTGCG    |
|                           | R: GATTCCGGCGTCATTCCTCT    |
| CC77DRAFT_687848          | F: TCCTGCGCTCACAGATACCT    |
|                           | R: TAGCTTGACCTTGCATGGGC    |

**Table S2.** Genomic features of the *B. amyloliquefaciens* XJ5

| Features                      | Genome    |
|-------------------------------|-----------|
| Genome size (bp)              | 4,160,003 |
| G+C content (%)               | 46.09     |
| Protein-coding genes          | 4199      |
| Gene total length (bp)        | 3,939,753 |
| Gene/genome (%)               | 88.74     |
| Intergenic region length (bp) | 499,752   |
| Intergenic length/genome (%)  | 11.26     |
| 5S rRNA                       | 9         |
| 16S rRNA                      | 9         |
| 23S rRNA                      | 9         |
| tRNA                          | 88        |

**Table S3.** Statistics of transcriptional group sequencing data

| Sample  | Raw reads | Clean reads | Q20(%) | Q30(%) | Mapped Reads       |
|---------|-----------|-------------|--------|--------|--------------------|
| CK-1    | 47923348  | 47437924    | 98.96  | 96.57  | 39,980,345(84.28%) |
| CK-2    | 44675094  | 44252032    | 98.93  | 96.50  | 37,381,401(84.47%) |
| CK-3    | 49962588  | 49456594    | 98.92  | 96.46  | 41,421,266(83.75%) |
| EP6h-1  | 52190462  | 51665380    | 98.96  | 96.56  | 42,504,386(82.27%) |
| EP6h-2  | 49152032  | 48617778    | 98.96  | 96.59  | 41,470,091(85.3%)  |
| EP6h-3  | 49277010  | 48777482    | 98.89  | 96.39  | 42,420,783(86.97%) |
| EP12h-1 | 53502866  | 52970852    | 98.91  | 96.42  | 45,575,068(86.04%) |
| EP12h-2 | 54218470  | 53717634    | 98.92  | 96.44  | 46,151,893(85.92%) |
| EP12h-3 | 49520036  | 49092778    | 98.87  | 96.30  | 41,867,157(85.28%) |
| EP24h-1 | 50111002  | 49605948    | 98.88  | 96.37  | 42,882,097(86.45%) |
| EP24h-2 | 50011662  | 49564260    | 98.97  | 96.60  | 42,245,634(85.23%) |
| EP24h-3 | 49505922  | 49061604    | 98.91  | 96.42  | 42,450,098(86.52%) |
| EP48h-1 | 49886078  | 49364242    | 98.98  | 96.63  | 42,862,509(86.83%) |

**Table S4.** The information of genes in the thirteen clusters

| Cluster 1      |           |           |         |                                                                        |
|----------------|-----------|-----------|---------|------------------------------------------------------------------------|
| Table of genes | locations | locations | strands | annotations of query cluster                                           |
| J4048_01135    | 197903    | 199250    | +       | phosphoglucosamine mutase                                              |
| J4048_01140    | 199681    | 201484    | +       | glutamine--fructose-6-phosphate transaminase (isomerizing)             |
| J4048_01145    | 201902    | 202775    | +       | ABC transporter ATP-binding protein                                    |
| J4048_01150    | 202752    | 203406    | +       | ABC-2 transporter permease                                             |
| J4048_01155    | 203508    | 204390    | -       | hypothetical protein                                                   |
| J4048_01160    | 204524    | 205691    | +       | DUF4885 family protein                                                 |
| J4048_01165    | 205743    | 206589    | -       | aldo/keto reductase                                                    |
| J4048_01170    | 206699    | 207392    | -       | LrgB family protein                                                    |
| J4048_01175    | 207361    | 207766    | -       | CidA/LrgA family holin-like protein                                    |
| J4048_01180    | 207961    | 208393    | +       | MarR family transcriptional regulator                                  |
| J4048_01185    | 208819    | 210205    | +       | amino acid permease                                                    |
| J4048_01190    | 210297    | 211002    | +       | YjjG family noncanonical pyrimidine nucleotidase                       |
| J4048_01195    | 211057    | 212215    | +       | sensor histidine kinase                                                |
| J4048_01200    | 212238    | 212892    | +       | response regulator transcription factor                                |
| J4048_01205    | 213109    | 214042    | +       | ABC transporter ATP-binding protein                                    |
| J4048_01210    | 214057    | 215266    | +       | ABC transporter permease                                               |
| J4048_01215    | 215268    | 216435    | +       | ABC transporter permease                                               |
| J4048_01220    | 216484    | 216664    | +       | hypothetical protein                                                   |
| J4048_01225    | 216736    | 217432    | +       | thioesterase                                                           |
| J4048_01230    | 217804    | 225427    | +       | non-ribosomal peptide synthetase                                       |
| J4048_01235    | 225386    | 233057    | +       | amino acid adenylation domain-containing protein                       |
| J4048_01240    | 233016    | 243774    | +       | amino acid adenylation domain-containing protein                       |
| J4048_01245    | 243856    | 245110    | +       | ACP S-malonyltransferase                                               |
| J4048_01250    | 245153    | 249926    | +       | SDR family NAD(P)-dependent oxidoreductase                             |
| J4048_01255    | 250111    | 254902    | +       | SDR family NAD(P)-dependent oxidoreductase                             |
| J4048_01260    | 254923    | 256447    | +       | NAD(P)/FAD-dependent oxidoreductase                                    |
| J4048_01265    | 256544    | 263165    | +       | non-ribosomal peptide synthetase                                       |
| J4048_01270    | 263185    | 264229    | +       | helix-turn-helix domain-containing protein                             |
| J4048_01275    | 264385    | 264862    | +       | DUF4879 domain-containing protein                                      |
| J4048_01280    | 264942    | 265191    | +       | sigma-G-dependent sporulation-specific acid-soluble spore protein CsgA |
| J4048_01285    | 265300    | 265999    | +       | DUF308 domain-containing protein                                       |
| J4048_01290    | 266043    | 266304    | -       | hypothetical protein                                                   |
| J4048_01295    | 266489    | 268109    | +       | APC family permease                                                    |
| J4048_01300    | 268512    | 269220    | +       | hypothetical protein                                                   |
| J4048_01305    | 269281    | 270484    | +       | hypothetical protein                                                   |
| J4048_01310    | 270558    | 270807    | +       | DUF2651 family protein                                                 |
| J4048_01315    | 270984    | 271872    | -       | glycerophosphodiester phosphodiesterase                                |
| J4048_01320    | 271967    | 273302    | -       | glycerol-3-phosphate transporter                                       |
| J4048_01325    | 273636    | 273879    | +       | DUF2651 family protein                                                 |
| J4048_01330    | 273934    | 275380    | -       | 4-hydroxyphenylacetate 3-monooxygenase, oxygenase component            |
| J4048_01335    | 275530    | 275956    | -       | hypothetical protein                                                   |
| J4048_01340    | 276028    | 278203    | -       | DUF1906 domain-containing protein                                      |
| J4048_01345    | 278578    | 279022    | +       | hypothetical protein                                                   |
| J4048_01350    | 279284    | 279755    | +       | helix-turn-helix domain-containing protein                             |
| J4048_01355    | 279826    | 280897    | +       | iron-containing alcohol dehydrogenase family protein                   |
| J4048_01360    | 280978    | 282133    | +       | phosphoribosylglycinamide formyltransferase 2                          |

|                       |                  |                  |                |                                                                       |
|-----------------------|------------------|------------------|----------------|-----------------------------------------------------------------------|
| J4048_01365           | 282609           | 283143           | +              | CDP-diacylglycerol--serine O-phosphatidyltransferase                  |
| <b>Cluster 2</b>      |                  |                  |                |                                                                       |
| <b>Table of genes</b> | <b>locations</b> | <b>locations</b> | <b>strands</b> | <b>annotations of query cluster</b>                                   |
| J4048_01750           | 361736           | 362747           | +              | NAD(P)/FAD-dependent oxidoreductase                                   |
| J4048_01755           | 362802           | 364242           | -              | uroporphyrinogen-III C-methyltransferase                              |
| J4048_01760           | 364308           | 364629           | -              | nitrite reductase small subunit NirD                                  |
| J4048_01765           | 364649           | 367067           | -              | NADPH-nitrite reductase                                               |
| J4048_01770           | 367186           | 369319           | -              | nitrate reductase                                                     |
| J4048_01775           | 369311           | 371639           | -              | FAD-dependent oxidoreductase                                          |
| J4048_01780           | 371819           | 373025           | +              | NarK/NasA family nitrate transporter                                  |
| J4048_01785           | 373212           | 374415           | +              | GTP-binding protein                                                   |
| J4048_01790           | 374479           | 375616           | +              | glutathione-dependent formaldehyde dehydrogenase                      |
| J4048_01795           | 375630           | 376065           | +              | RDD family protein                                                    |
| J4048_01800           | 376136           | 376460           | +              | YckD family protein                                                   |
| J4048_01805           | 376563           | 378000           | +              | family 1 glycosylhydrolase                                            |
| J4048_01810           | 378040           | 378439           | -              | competence protein ComJ                                               |
| J4048_01815           | 378459           | 378897           | -              | sporulation protein                                                   |
| J4048_01820           | 379254           | 379812           | -              | 6-phospho-3-hexuloisomerase                                           |
| J4048_01825           | 379808           | 380444           | -              | 3-hexulose-6-phosphate synthase                                       |
| J4048_01830           | 380675           | 381038           | +              | helix-turn-helix transcriptional regulator                            |
| J4048_01835           | 381626           | 392381           | +              | surfactin non-ribosomal peptide synthetase SrfAA                      |
| J4048_01840           | 392402           | 403163           | +              | surfactin non-ribosomal peptide synthetase SrfAB                      |
| J4048_01845           | 403197           | 407034           | +              | surfactin non-ribosomal peptide synthetase SrfAC                      |
| J4048_01850           | 407053           | 407785           | +              | surfactin biosynthesis thioesterase SrfAD                             |
| J4048_01855           | 407906           | 409217           | +              | aminotransferase class I/II-fold pyridoxal phosphate-dependent enzyme |
| J4048_01860           | 409251           | 409791           | -              | YcxB family protein                                                   |
| J4048_01865           | 409787           | 410750           | -              | DMT family transporter                                                |
| J4048_01870           | 410868           | 412179           | +              | PLP-dependent aminotransferase family protein                         |
| J4048_01875           | 412173           | 412848           | -              | 4'-phosphopantetheinyl transferase superfamily protein                |
| J4048_01880           | 412945           | 413575           | -              | YitT family protein                                                   |
| J4048_01885           | 413674           | 414418           | -              | cystine ABC transporter ATP-binding protein TcyC                      |
| J4048_01890           | 414430           | 415135           | -              | amino acid ABC transporter permease                                   |
| J4048_01895           | 415121           | 415919           | -              | cystine ABC transporter substrate-binding lipoprotein TcyA            |
| J4048_01900           | 416047           | 416920           | -              | LysR family transcriptional regulator                                 |
| J4048_01905           | 417013           | 417628           | +              | UbiX family flavin prenyltransferase                                  |
| J4048_01910           | 417630           | 419052           | +              | phenolic acid decarboxylase BsdC                                      |
| J4048_01915           | 419069           | 419297           | +              | hypothetical protein                                                  |
| J4048_01920           | 419296           | 419758           | +              | pyridoxamine 5'-phosphate oxidase family protein                      |
| J4048_01925           | 419806           | 421285           | -              | peptide MFS transporter                                               |
| J4048_01930           | 421563           | 423309           | +              | right-handed parallel beta-helix repeat-containing protein            |
| J4048_01935           | 423400           | 423622           | -              | hypothetical protein                                                  |
| J4048_01940           | 423743           | 425384           | +              | spore germination protein                                             |
| J4048_01945           | 425370           | 426597           | +              | Ger(x)C family spore germination protein                              |
| <b>Cluster 3</b>      |                  |                  |                |                                                                       |
| <b>Table of genes</b> | <b>locations</b> | <b>locations</b> | <b>strands</b> | <b>annotations of query cluster</b>                                   |
| J4048_04825           | 963295           | 963730           | -              | nitric oxide-sensing transcriptional repressor NsrR                   |
| J4048_04830           | 963864           | 965379           | -              | mechanosensitive ion channel                                          |
| J4048_04835           | 965548           | 966955           | +              | SpoVR family protein                                                  |

| J4048_04840    | 966993     | 968373     | -        | alkaline phosphatase                                 |
|----------------|------------|------------|----------|------------------------------------------------------|
| J4048_04845    | 968831     | 969656     | +        | LysM peptidoglycan-binding domain-containing protein |
| J4048_04850    | 969724     | 970600     | -        | LysR family transcriptional regulator                |
| J4048_04855    | 970709     | 971813     | +        | citrate synthase/methylcitrate synthase              |
| J4048_04860    | 971892     | 972762     | +        | SDR family oxidoreductase                            |
| J4048_04865    | 973092     | 974496     | +        | amino acid permease                                  |
| J4048_04870    | 974610     | 975966     | +        | sodium-dependent transporter                         |
| J4048_04875    | 976002     | 976293     | -        | anti-sigma factor                                    |
| J4048_04880    | 976280     | 977354     | -        | anti-sigma factor                                    |
| J4048_04885    | 977346     | 977838     | -        | RNA polymerase sigma factor SigM                     |
| J4048_04890    | 978078     | 978678     | +        | 1-acylglycerol-3-phosphate O-acyltransferase         |
| J4048_04895    | 978723     | 980058     | -        | HlyC/CorC family transporter                         |
| J4048_04900    | 980119     | 980545     | -        | MerR family transcriptional regulator                |
| J4048_04905    | 980724     | 981909     | +        | pyridoxal phosphate-dependent aminotransferase       |
| J4048_04910    | 981941     | 983186     | +        | polyketide beta-ketoacyl:ACP synthase                |
| J4048_04915    | 983415     | 984804     | +        | HlyC/CorC family transporter                         |
| J4048_04920    | 984817     | 985177     | -        | fluoride efflux transporter CrcB                     |
| J4048_04925    | 985173     | 985569     | -        | CrcB family protein                                  |
| J4048_04930    | 985570     | 986287     | -        | glycerophosphodiester phosphodiesterase              |
| J4048_04935    | 986456     | 986561     | +        | YhdX family protein                                  |
| J4048_04940    | 986723     | 987839     | +        | mechanosensitive ion channel family protein          |
| J4048_04945    | 987890     | 988634     | +        | NAD-dependent protein deacylase                      |
| J4048_04950    | 988667     | 989516     | -        | polysaccharide deacetylase                           |
| J4048_04955    | 989772     | 990624     | +        | D-amino-acid transaminase                            |
| J4048_04960    | 990665     | 991250     | -        | TetR/AcrR family transcriptional regulator           |
| J4048_04965    | 991358     | 991910     | +        | hypothetical protein                                 |
| J4048_04970    | 991948     | 992449     | -        | universal stress protein                             |
| J4048_04975    | 992870     | 994628     | +        | ATP-binding cassette domain-containing protein       |
| J4048_04980    | 994624     | 996646     | +        | ABC transporter ATP-binding protein                  |
| J4048_04985    | 996685     | 997306     | -        | NAD(P)H-binding protein                              |
| J4048_04990    | 997561     | 997768     | -        | alpha/beta-type small acid-soluble spore protein     |
| J4048_04995    | 997992     | 998208     | -        | YheE family protein                                  |
| J4048_05000    | 998290     | 999649     | -        | YheC/YheD family protein                             |
| J4048_05005    | 999638     | 1000730    | -        | YheC/YheD family protein                             |
| J4048_05010    | 1000967    | 1002101    | +        | DUF445 domain-containing protein                     |
| J4048_05015    | 1002186    | 1002537    | +        | YlbF family regulator                                |
| Cluster 4      |            |            |          |                                                      |
| Table of genes | locat-ions | locat-ions | stran ds | annotations of query cluster                         |
| J4048_05435    | 1088790    | 1089084    | +        | HNH endonuclease                                     |
| J4048_05440    | 1089127    | 1089346    | -        | spore germination protein                            |
| J4048_05445    | 1089385    | 1089781    | -        | spore germination protein GerPE                      |
| J4048_05450    | 1089780    | 1089957    | -        | spore germination protein GerPD                      |
| J4048_05455    | 1089953    | 1090571    | -        | spore germination protein GerPC                      |
| J4048_05460    | 1090606    | 1090843    | -        | spore germination protein GerPB                      |
| J4048_05465    | 1090855    | 1091077    | -        | spore germination protein                            |
| J4048_05470    | 1091266    | 1091482    | -        | aspartyl-phosphate phosphatase Spo0E family protein  |
| J4048_05475    | 1091699    | 1092605    | +        | fumarylacetoacetate hydrolase family protein         |
| J4048_05480    | 1092698    | 1093055    | +        | YisL family protein                                  |
| J4048_05485    | 1093055    | 1093273    | -        | hypothetical protein                                 |



|                       |                  |                  |                |                                                                                   |
|-----------------------|------------------|------------------|----------------|-----------------------------------------------------------------------------------|
| J4048_05490           | 1093308          | 1093851          | -              | DUF2777 family protein                                                            |
| J4048_05495           | 1094026          | 1095868          | +              | asparagine synthase (glutamine-hydrolyzing)                                       |
| J4048_05500           | 1095953          | 1096694          | +              | squalene/phytoene synthase family protein                                         |
| J4048_05505           | 1096728          | 1098096          | -              | MATE family efflux transporter                                                    |
| J4048_05510           | 1098218          | 1099082          | +              | helix-turn-helix transcriptional regulator                                        |
| J4048_05515           | 1099225          | 1099720          | -              | damage-inducible protein DinB                                                     |
| J4048_05520           | 1099773          | 1100382          | -              | amino acid transporter                                                            |
| J4048_05525           | 1100507          | 1101950          | +              | PLP-dependent aminotransferase family protein                                     |
| J4048_05530           | 1101957          | 1102584          | -              | pentapeptide repeat-containing protein                                            |
| J4048_05535           | 1102779          | 1103220          | -              | GNAT family N-acetyltransferase                                                   |
| J4048_05540           | 1103302          | 1105144          | -              | bifunctional homocysteine S-methyltransferase/methylenetetrahydrofolate reductase |
| J4048_05545           | 1105455          | 1105947          | -              | YajQ family cyclic di-GMP-binding protein                                         |
| <b>Cluster 5</b>      |                  |                  |                |                                                                                   |
| <b>Table of genes</b> | <b>locations</b> | <b>locations</b> | <b>strands</b> | <b>annotations of query cluster</b>                                               |
| J4048_07285           | 1421706          | 1422618          | +              | 1-phosphofructokinase                                                             |
| J4048_07290           | 1422632          | 1424537          | +              | PTS sugar transporter subunit IIA                                                 |
| J4048_07295           | 1424667          | 1425249          | +              | signal peptidase I                                                                |
| J4048_07300           | 1425285          | 1425555          | -              | hypothetical protein                                                              |
| J4048_07305           | 1425717          | 1427337          | +              | ATP-binding cassette domain-containing protein                                    |
| J4048_07310           | 1427449          | 1428358          | +              | ketopantoate reductase family protein                                             |
| J4048_07315           | 1428389          | 1429622          | -              | aminopeptidase                                                                    |
| J4048_07320           | 1429722          | 1429857          | -              | protein YkpC                                                                      |
| J4048_07325           | 1429928          | 1430936          | -              | cell shape-determining protein MreBH                                              |
| J4048_07330           | 1431206          | 1431491          | +              | AbrB/MazE/SpoVT family DNA-binding domain-containing protein                      |
| J4048_07335           | 1431663          | 1432968          | +              | PAS domain-containing protein                                                     |
| J4048_07340           | 1432969          | 1433797          | +              | gamma-glutamylcyclotransferase                                                    |
| J4048_07345           | 1433837          | 1434503          | +              | Ktr system potassium transporter KtrC                                             |
| J4048_07350           | 1434651          | 1436385          | +              | adenine deaminase                                                                 |
| J4048_07355           | 1436417          | 1438085          | -              | ribonuclease J1                                                                   |
| J4048_07360           | 1438090          | 1438300          | -              | DNA-dependent RNA polymerase auxiliary subunit epsilon family protein             |
| J4048_07365           | 1438654          | 1439428          | +              | Cof-type HAD-IIB family hydrolase                                                 |
| J4048_07370           | 1439462          | 1440017          | -              | peptide deformylase                                                               |
| J4048_07375           | 1440129          | 1440309          | -              | YjcZ family sporulation protein                                                   |
| J4048_07380           | 1440553          | 1441192          | +              | YkyA family protein                                                               |
| J4048_07385           | 1441647          | 1443954          | +              | ACP S-malonyltransferase                                                          |
| J4048_07390           | 1443975          | 1456230          | +              | SDR family NAD(P)-dependent oxidoreductase                                        |
| J4048_07395           | 1456229          | 1461002          | +              | SDR family NAD(P)-dependent oxidoreductase                                        |
| J4048_07400           | 1461049          | 1469758          | +              | SDR family NAD(P)-dependent oxidoreductase                                        |
| J4048_07405           | 1469750          | 1476755          | +              | SDR family NAD(P)-dependent oxidoreductase                                        |
| J4048_07410           | 1476778          | 1482490          | +              | SDR family NAD(P)-dependent oxidoreductase                                        |
| J4048_07415           | 1482489          | 1489869          | +              | SDR family NAD(P)-dependent oxidoreductase                                        |
| J4048_07420           | 1489919          | 1493771          | +              | alpha/beta fold hydrolase                                                         |
| J4048_07425           | 1493803          | 1494895          | +              | beta-lactamase family protein                                                     |
| J4048_07430           | 1495365          | 1496481          | +              | pyruvate dehydrogenase (acetyl-transferring) E1 component subunit alpha           |
| J4048_07435           | 1496484          | 1497462          | +              | pyruvate dehydrogenase complex E1 component subunit beta                          |
| J4048_07440           | 1497585          | 1498914          | +              | pyruvate dehydrogenase complex dihydrolipoyllysine-residue acetyltransferase      |
| J4048_07445           | 1498918          | 1500331          | +              | dihydrolipoyl dehydrogenase                                                       |
| J4048_07450           | 1500378          | 1500753          | -              | hypothetical protein                                                              |

|                       |                  |                  |                |                                                                       |
|-----------------------|------------------|------------------|----------------|-----------------------------------------------------------------------|
| J4048_07455           | 1501001          | 1501802          | +              | polysaccharide deacetylase family protein                             |
| J4048_07460           | 1501915          | 1502035          | +              | GapA-binding peptide SR1P                                             |
| J4048_07465           | 1502082          | 1503555          | -              | aminotransferase class I/II-fold pyridoxal phosphate-dependent enzyme |
| J4048_07470           | 1503734          | 1504001          | +              | UPF0223 family protein                                                |
| J4048_07475           | 1504035          | 1504668          | -              | DUF1054 domain-containing protein                                     |
| J4048_07480           | 1504904          | 1505093          | +              | hypothetical protein                                                  |
| J4048_07485           | 1505226          | 1506024          | +              | inositol-1-monophosphatase                                            |
| J4048_07490           | 1506010          | 1506463          | +              | GNAT family N-acetyltransferase                                       |
| J4048_07495           | 1506514          | 1508080          | -              | peptidase M4 family protein                                           |
| <b>Cluster 6</b>      |                  |                  |                |                                                                       |
| <b>Table of genes</b> | <b>locations</b> | <b>locations</b> | <b>strands</b> | <b>annotations of query cluster</b>                                   |
| J4048_08615           | 1735555          | 1737115          | +              | ribonuclease Y                                                        |
| J4048_08620           | 1737175          | 1737970          | +              | TIGR00282 family metallophosphoesterase                               |
| J4048_08625           | 1738169          | 1738430          | +              | stage V sporulation protein SpoVS                                     |
| J4048_08630           | 1738687          | 1739734          | +              | L-threonine 3-dehydrogenase                                           |
| J4048_08635           | 1739746          | 1740925          | +              | glycine C-acetyltransferase                                           |
| J4048_08640           | 1741067          | 1742597          | +              | tRNA (N6-isopentenyl adenosine(37)-C2)-methylthiotransferase MiaB     |
| J4048_08645           | 1742599          | 1743031          | +              | RicAFT regulatory complex protein RicA family protein                 |
| J4048_08650           | 1743285          | 1743831          | +              | outer spore coat protein CotE                                         |
| J4048_08655           | 1743949          | 1746535          | +              | DNA mismatch repair protein MutS                                      |
| J4048_08660           | 1746550          | 1748425          | +              | DNA mismatch repair endonuclease MutL                                 |
| J4048_08665           | 1748476          | 1749094          | -              | site-specific integrase                                               |
| J4048_08670           | 1749532          | 1749835          | +              | hypothetical protein                                                  |
| J4048_08675           | 1750870          | 1751080          | -              | hypothetical protein                                                  |
| J4048_08680           | 1751166          | 1751688          | -              | hypothetical protein                                                  |
| J4048_08685           | 1753220          | 1753898          | +              | MBL fold metallo-hydrolase                                            |
| J4048_08690           | 1754212          | 1755082          | +              | ACP S-malonyltransferase                                              |
| J4048_08695           | 1755218          | 1756193          | +              | acyltransferase domain-containing protein                             |
| J4048_08700           | 1756194          | 1758435          | +              | ACP S-malonyltransferase                                              |
| J4048_08705           | 1758500          | 1758749          | +              | acyl carrier protein                                                  |
| J4048_08710           | 1758800          | 1760063          | +              | hydroxymethylglutaryl-CoA synthase family protein                     |
| J4048_08715           | 1760059          | 1760833          | +              | enoyl-CoA hydratase/isomerase                                         |
| J4048_08720           | 1760842          | 1761592          | +              | enoyl-CoA hydratase/isomerase family protein                          |
| J4048_08725           | 1761631          | 1776583          | +              | non-ribosomal peptide synthetase                                      |
| J4048_08730           | 1776584          | 1789991          | +              | SDR family NAD(P)-dependent oxidoreductase                            |
| J4048_08735           | 1790008          | 1800556          | +              | SDR family NAD(P)-dependent oxidoreductase                            |
| J4048_08740           | 1800545          | 1816844          | +              | non-ribosomal peptide synthetase                                      |
| J4048_08745           | 1816857          | 1824315          | +              | polyketide synthase dehydratase domain-containing protein             |
| J4048_08750           | 1824451          | 1825663          | -              | cytochrome P450                                                       |
| J4048_08755           | 1825951          | 1826386          | +              | sporulation protein                                                   |
| J4048_08760           | 1826445          | 1827201          | +              | DUF1275 domain-containing protein                                     |
| J4048_08765           | 1827234          | 1827597          | -              | hypothetical protein                                                  |
| J4048_08770           | 1827789          | 1829118          | -              | S8 family peptidase                                                   |
| J4048_08775           | 1829296          | 1829530          | +              | hypothetical protein                                                  |
| J4048_08780           | 1829785          | 1830493          | +              | poly-gamma-glutamate hydrolase family protein                         |
| J4048_08785           | 1830552          | 1831005          | +              | OsmC family protein                                                   |
| J4048_08790           | 1831018          | 1831375          | -              | multidrug efflux SMR transporter                                      |
| J4048_08795           | 1831389          | 1831704          | -              | multidrug efflux SMR transporter                                      |
| J4048_08800           | 1831841          | 1832147          | -              | hypothetical protein                                                  |

|                       |                  |                  |                |                                                                          |
|-----------------------|------------------|------------------|----------------|--------------------------------------------------------------------------|
| J4048_08805           | 1832248          | 1832653          | +              | hypothetical protein                                                     |
| J4048_08810           | 1832751          | 1833696          | +              | tRNA (adenosine(37)-N6)-dimethylallyltransferase MiaA                    |
| J4048_08815           | 1833735          | 1833957          | +              | RNA chaperone Hfq                                                        |
| J4048_08820           | 1834053          | 1834329          | +              | hypothetical protein                                                     |
| J4048_08825           | 1834411          | 1834627          | +              | hypothetical protein                                                     |
| J4048_08830           | 1834886          | 1835279          | +              | class Ib ribonucleoside-diphosphate reductase assembly flavoprotein NrdI |
| <b>Cluster 7</b>      |                  |                  |                |                                                                          |
| <b>Table of genes</b> | <b>locations</b> | <b>locations</b> | <b>strands</b> | <b>annotations of query cluster</b>                                      |
| J4048_09255           | 1915060          | 1915279          | +              | hypothetical protein                                                     |
| J4048_09260           | 1915586          | 1915727          | +              | hypothetical protein                                                     |
| J4048_09265           | 1916228          | 1916831          | +              | hypothetical protein                                                     |
| J4048_09270           | 1916952          | 1917288          | -              | hypothetical protein                                                     |
| J4048_09275           | 1918051          | 1919158          | +              | tetratricopeptide repeat protein                                         |
| J4048_09280           | 1919154          | 1919295          | +              | hypothetical protein                                                     |
| J4048_09285           | 1919467          | 1919746          | +              | hypothetical protein                                                     |
| J4048_09290           | 1919909          | 1920575          | -              | DUF2325 domain-containing protein                                        |
| J4048_09295           | 1920887          | 1921247          | +              | lactococcin 972 family bacteriocin                                       |
| J4048_09300           | 1921332          | 1923498          | +              | DUF1430 domain-containing protein                                        |
| J4048_09305           | 1923494          | 1924115          | +              | ABC transporter ATP-binding protein                                      |
| J4048_09310           | 1924128          | 1924338          | +              | bacteriocin-like WGxF protein                                            |
| J4048_09315           | 1924596          | 1924908          | +              | hypothetical protein                                                     |
| J4048_09320           | 1925199          | 1926061          | -              | choline esterase                                                         |
| J4048_09325           | 1926318          | 1927818          | -              | cellulase family glycosylhydrolase                                       |
| J4048_09330           | 1928267          | 1928579          | +              | DUF4870 domain-containing protein                                        |
| J4048_09335           | 1928630          | 1930031          | -              | HAMP domain-containing histidine kinase                                  |
| J4048_09340           | 1930033          | 1930741          | -              | response regulator transcription factor                                  |
| J4048_09345           | 1930882          | 1932154          | -              | glucuronoxylanase                                                        |
| J4048_09350           | 1932231          | 1933770          | -              | carbohydrate-binding protein                                             |
| J4048_09355           | 1934094          | 1941951          | -              | non-ribosomal peptide synthetase                                         |
| J4048_09360           | 1942039          | 1958128          | -              | non-ribosomal peptide synthetase                                         |
| J4048_09365           | 1958172          | 1970121          | -              | bacillomycin D hybrid PKS/NRPS BamA                                      |
| J4048_09370           | 1970140          | 1971343          | -              | bacillomycin D biosynthesis malonyl-CoA transacylase BamD                |
| J4048_09375           | 1971897          | 1972683          | -              | 3-hydroxybutyrate dehydrogenase                                          |
| J4048_09380           | 1972695          | 1973358          | -              | CoA transferase subunit B                                                |
| J4048_09385           | 1973375          | 1974077          | -              | CoA transferase subunit A                                                |
| J4048_09390           | 1974101          | 1975538          | -              | GntP family permease                                                     |
| J4048_09395           | 1975840          | 1977037          | -              | cytochrome P450                                                          |
| J4048_09400           | 1977038          | 1978058          | -              | biotin synthase BioB                                                     |
| J4048_09405           | 1978060          | 1978762          | -              | ATP-dependent dethiobiotin synthetase BioD                               |
| J4048_09410           | 1978758          | 1979919          | -              | 8-amino-7-oxononanoate synthase                                          |
| J4048_09415           | 1979908          | 1981255          | -              | adenosylmethionine--8-amino-7-oxononanoate transaminase                  |
| J4048_09420           | 1981251          | 1982022          | -              | 6-carboxyhexanoate--CoA ligase                                           |
| J4048_09425           | 1982298          | 1982706          | +              | GtrA family protein                                                      |
| J4048_09430           | 1982712          | 1983606          | +              | UTP--glucose-1-phosphate uridylyltransferase GalU                        |
| J4048_09435           | 1983680          | 1984271          | +              | DedA family protein                                                      |
| J4048_09440           | 1984324          | 1985854          | -              | acyl-CoA carboxylase subunit beta                                        |
| J4048_09445           | 1985871          | 1986651          | -              | enoyl-CoA hydratase                                                      |
| J4048_09450           | 1986664          | 1987564          | -              | hydroxymethylglutaryl-CoA lyase                                          |
| J4048_09455           | 1987579          | 1987792          | -              | acetyl-CoA carboxylase biotin carboxyl carrier protein subunit           |

| J4048_09460    | 1987788   | 1989138   | -       | acetyl-CoA carboxylase biotin carboxylase subunit                                     |
|----------------|-----------|-----------|---------|---------------------------------------------------------------------------------------|
| J4048_09465    | 1989159   | 1990800   | -       | AMP-binding protein                                                                   |
| J4048_09470    | 1990845   | 1991988   | -       | acyl-CoA dehydrogenase family protein                                                 |
| J4048_09475    | 1992128   | 1993667   | -       | family 10 glycosylhydrolase                                                           |
| J4048_09480    | 1993789   | 1994170   | -       | DUF1360 domain-containing protein                                                     |
| J4048_09485    | 1994242   | 1998046   | -       | non-ribosomal peptide synthase                                                        |
| J4048_09490    | 1998064   | 2008840   | -       | amino acid adenylation domain-containing protein                                      |
| J4048_09495    | 2008865   | 2016515   | -       | non-ribosomal peptide synthetase                                                      |
| J4048_09500    | 2016530   | 2024228   | -       | non-ribosomal peptide synthetase                                                      |
| J4048_09505    | 2024253   | 2031933   | -       | amino acid adenylation domain-containing protein                                      |
| J4048_09510    | 2031948   | 2039647   | -       | non-ribosomal peptide synthetase                                                      |
| J4048_09515    | 2039672   | 2047331   | -       | non-ribosomal peptide synthetase                                                      |
| J4048_09520    | 2047810   | 2049286   | -       | D-alanyl-D-alanine carboxypeptidase/D-alanyl-D-alanine-endopeptidase                  |
| J4048_09525    | 2049304   | 2050273   | -       | aldose 1-epimerase                                                                    |
| J4048_09530    | 2050388   | 2051777   | -       | MATE family efflux transporter                                                        |
| J4048_09535    | 2052003   | 2052546   | +       | IseA DL-endopeptidase inhibitor family protein                                        |
| J4048_09545    | 2052979   | 2053525   | -       | site-specific integrase                                                               |
| J4048_09550    | 2053839   | 2054070   | -       | excisionase family DNA-binding protein                                                |
| J4048_09555    | 2054313   | 2056089   | +       | gamma-glutamyltransferase                                                             |
| J4048_09560    | 2056133   | 2057309   | -       | MFS transporter                                                                       |
| J4048_09565    | 2057452   | 2057755   | -       | winged helix-turn-helix transcriptional regulator                                     |
| J4048_09570    | 2057801   | 2058086   | -       | threonyl-tRNA synthetase                                                              |
| J4048_09575    | 2058085   | 2058949   | -       | LysR family transcriptional regulator                                                 |
| J4048_09580    | 2059067   | 2060048   | +       | zinc-binding dehydrogenase                                                            |
| J4048_09585    | 2060371   | 2061853   | -       | glutamate synthase small subunit                                                      |
| J4048_09590    | 2061869   | 2066429   | -       | glutamate synthase large subunit                                                      |
| Cluster 8      |           |           |         |                                                                                       |
| Table of genes | locations | locations | strands | annotations of query cluster                                                          |
| J4048_09730    | 2090607   | 2091000   | -       | hypothetical protein                                                                  |
| J4048_09735    | 2091162   | 2092032   | -       | LysM peptidoglycan-binding domain-containing protein                                  |
| J4048_09740    | 2092267   | 2094046   | -       | DNA helicase RecQ                                                                     |
| J4048_09750    | 2094554   | 2095181   | -       | FMN-dependent NADH-azoreductase                                                       |
| J4048_09755    | 2095325   | 2095817   | -       | TraR/DksA C4-type zinc finger protein                                                 |
| J4048_09760    | 2095899   | 2096280   | -       | hypothetical protein                                                                  |
| J4048_09765    | 2096372   | 2096606   | +       | hypothetical protein                                                                  |
| J4048_09770    | 2096592   | 2097075   | -       | Hsp20/alpha crystallin family protein                                                 |
| J4048_09775    | 2097145   | 2097418   | +       | hypothetical protein                                                                  |
| J4048_09780    | 2097414   | 2097648   | +       | hypothetical protein                                                                  |
| J4048_09785    | 2097692   | 2098037   | -       | PH domain-containing protein                                                          |
| J4048_09790    | 2098330   | 2098471   | -       | DUF4025 domain-containing protein                                                     |
| J4048_09795    | 2098536   | 2098740   | -       | hypothetical protein                                                                  |
| J4048_09800    | 2098923   | 2100411   | +       | aldehyde dehydrogenase family protein                                                 |
| J4048_09805    | 2100506   | 2102391   | +       | squalene--hopene cyclase                                                              |
| J4048_09810    | 2102387   | 2103233   | +       | superoxide dismutase                                                                  |
| J4048_09815    | 2103272   | 2104610   | -       | sodium-dependent transporter                                                          |
| J4048_09820    | 2104809   | 2105781   | +       | bile acid:sodium symporter family protein                                             |
| J4048_09825    | 2105813   | 2106560   | -       | MBL fold metallo-hydrolase                                                            |
| J4048_09830    | 2106632   | 2107880   | -       | 2-oxoglutarate dehydrogenase complex dihydrolipoyllysine-residue succinyl-transferase |

|                       |                  |                  |                |                                                             |
|-----------------------|------------------|------------------|----------------|-------------------------------------------------------------|
| J4048_09835           | 2107895          | 2110730          | -              | 2-oxoglutarate dehydrogenase E1 component                   |
| <b>Cluster 9</b>      |                  |                  |                |                                                             |
| <b>Table of genes</b> | <b>locations</b> | <b>locations</b> | <b>strands</b> | <b>annotations of query cluster</b>                         |
| J4048_10260           | 2179462          | 2179948          | -              | dihydrofolate reductase                                     |
| J4048_10265           | 2179944          | 2180739          | -              | thymidylate synthase                                        |
| J4048_10270           | 2180838          | 2181447          | -              | YpjP family protein                                         |
| J4048_10275           | 2181709          | 2182480          | -              | class I SAM-dependent methyltransferase                     |
| J4048_10280           | 2182519          | 2182954          | -              | BrxA/BrxB family bacilliredoxin                             |
| J4048_10285           | 2183035          | 2184712          | -              | dihydroxy-acid dehydratase                                  |
| J4048_10290           | 2184964          | 2186098          | -              | conserved virulence factor C family protein                 |
| J4048_10295           | 2186166          | 2186774          | -              | HD domain-containing protein                                |
| J4048_10300           | 2186785          | 2187268          | -              | glutathione peroxidase                                      |
| J4048_10305           | 2187551          | 2188457          | +              | homoserine O-succinyltransferase                            |
| J4048_10310           | 2188681          | 2189824          | +              | diglucosyl diacylglycerol synthase                          |
| J4048_10315           | 2189902          | 2190029          | +              | hypothetical protein                                        |
| J4048_10320           | 2190044          | 2190245          | +              | cold-shock protein CspD                                     |
| J4048_10325           | 2190296          | 2190479          | -              | hypothetical protein                                        |
| J4048_10330           | 2190640          | 2190898          | +              | DUF2564 family protein                                      |
| J4048_10335           | 2190924          | 2191107          | -              | zinc-finger domain-containing protein                       |
| J4048_10340           | 2191109          | 2191781          | -              | reverse transcriptase-like protein                          |
| J4048_10345           | 2191862          | 2192543          | +              | queuosine precursor transporter                             |
| J4048_10350           | 2192549          | 2192942          | +              | reverse transcriptase-like protein                          |
| J4048_10355           | 2192993          | 2193122          | +              | small, acid-soluble spore protein L                         |
| J4048_10360           | 2193127          | 2194015          | -              | 5'-3' exonuclease                                           |
| J4048_10365           | 2194110          | 2194254          | -              | hypothetical protein                                        |
| J4048_10370           | 2194330          | 2194588          | -              | YpbS family protein                                         |
| J4048_10375           | 2194656          | 2198238          | -              | dynamain family protein                                     |
| J4048_10380           | 2198421          | 2198517          | -              | Fur-regulated basic protein FbpC                            |
| J4048_10385           | 2198589          | 2199096          | -              | isoprenylcysteine carboxyl methyltransferase family protein |
| J4048_10390           | 2199095          | 2200196          | -              | type III polyketide synthase                                |
| J4048_10395           | 2200361          | 2200970          | +              | GNAT family N-acetyltransferase                             |
| J4048_10400           | 2200998          | 2201307          | -              | MGMT family protein                                         |
| J4048_10405           | 2201528          | 2201792          | +              | transcriptional regulator                                   |
| J4048_10410           | 2202528          | 2203106          | +              | DUF421 domain-containing protein                            |
| J4048_10415           | 2203346          | 2203913          | -              | cysteine hydrolase                                          |
| J4048_10420           | 2204262          | 2204538          | +              | hypothetical protein                                        |
| J4048_10425           | 2204785          | 2205706          | -              | purine permease                                             |
| J4048_10430           | 2205741          | 2205894          | -              | hypothetical protein                                        |
| J4048_10435           | 2205902          | 2206457          | -              | Holliday junction resolvase RecU                            |
| J4048_10440           | 2206554          | 2206794          | +              | helix-turn-helix transcriptional regulator                  |
| J4048_10445           | 2207024          | 2207189          | -              | hypothetical protein                                        |
| J4048_10450           | 2207185          | 2207359          | -              | hypothetical protein                                        |
| J4048_10455           | 2207373          | 2207691          | -              | hypothetical protein                                        |
| J4048_10460           | 2207787          | 2208108          | -              | hypothetical protein                                        |
| J4048_10465           | 2208214          | 2208367          | -              | hypothetical protein                                        |
| J4048_10470           | 2208411          | 2208651          | -              | hypothetical protein                                        |
| J4048_10475           | 2208689          | 2208869          | -              | hypothetical protein                                        |
| J4048_10480           | 2208914          | 2209136          | -              | hypothetical protein                                        |
| J4048_10485           | 2209145          | 2209973          | -              | metallophosphoesterase                                      |

| J4048_10490    | 2209974   | 2210919   | -       | HNH endonuclease                                           |
|----------------|-----------|-----------|---------|------------------------------------------------------------|
| J4048_10495    | 2211186   | 2211528   | -       | hypothetical protein                                       |
| J4048_10500    | 2211655   | 2212018   | -       | hypothetical protein                                       |
| J4048_10505    | 2212014   | 2212365   | -       | hypothetical protein                                       |
| J4048_10510    | 2212502   | 2212829   | -       | hypothetical protein                                       |
| J4048_10515    | 2212888   | 2213254   | -       | hypothetical protein                                       |
| J4048_10520    | 2213382   | 2213889   | -       | dihydrofolate reductase                                    |
| J4048_10525    | 2213888   | 2214728   | -       | thymidylate synthase                                       |
| J4048_10530    | 2215503   | 2215803   | -       | hypothetical protein                                       |
| J4048_10535    | 2215920   | 2216085   | -       | hypothetical protein                                       |
| J4048_10540    | 2216195   | 2216810   | -       | hypothetical protein                                       |
| J4048_10545    | 2216868   | 2217231   | -       | hypothetical protein                                       |
| J4048_10550    | 2217279   | 2217786   | -       | hypothetical protein                                       |
| J4048_10555    | 2217785   | 2218034   | -       | thioredoxin                                                |
| J4048_10560    | 2218030   | 2219026   | -       | class 1b ribonucleoside-diphosphate reductase subunit beta |
| J4048_10565    | 2219089   | 2219428   | +       | hypothetical protein                                       |
| Cluster 10     |           |           |         |                                                            |
| Table of genes | locations | locations | strands | annotations of query cluster                               |
| J4048_12175    | 2484067   | 2484844   | -       | SDR family oxidoreductase                                  |
| J4048_12180    | 2484849   | 2485809   | -       | MBL fold metallo-hydrolase                                 |
| J4048_12185    | 2486204   | 2487044   | +       | pyrroline-5-carboxylate reductase                          |
| J4048_12190    | 2487080   | 2487827   | -       | enoyl-CoA hydratase/isomerase family protein               |
| J4048_12195    | 2487886   | 2489134   | -       | hydroxymethylglutaryl-CoA synthase family protein          |
| J4048_12200    | 2489191   | 2490346   | -       | cytochrome P450                                            |
| J4048_12205    | 2490427   | 2496643   | -       | zinc-binding dehydrogenase                                 |
| J4048_12210    | 2496639   | 2502792   | -       | SDR family NAD(P)-dependent oxidoreductase                 |
| J4048_12215    | 2502814   | 2510533   | -       | SDR family NAD(P)-dependent oxidoreductase                 |
| J4048_12220    | 2510537   | 2526152   | -       | SDR family NAD(P)-dependent oxidoreductase                 |
| J4048_12225    | 2526203   | 2531930   | -       | SDR family NAD(P)-dependent oxidoreductase                 |
| J4048_12230    | 2531969   | 2538266   | -       | KR domain-containing protein                               |
| J4048_12235    | 2538284   | 2550878   | -       | SDR family NAD(P)-dependent oxidoreductase                 |
| J4048_12240    | 2550917   | 2551655   | -       | SDR family oxidoreductase                                  |
| J4048_12245    | 2551669   | 2553034   | -       | AMP-binding protein                                        |
| J4048_12250    | 2553030   | 2553303   | -       | acyl carrier protein                                       |
| J4048_12255    | 2553327   | 2554308   | -       | D-fructose-6-phosphate amidotransferase                    |
| J4048_12260    | 2554348   | 2556607   | -       | ACP S-malonyltransferase                                   |
| J4048_12265    | 2557341   | 2557872   | +       | antiterminator LoaP                                        |
| J4048_12270    | 2557888   | 2558071   | -       | hypothetical protein                                       |
| J4048_12275    | 2558103   | 2558316   | +       | hypothetical protein                                       |
| J4048_12280    | 2558455   | 2559472   | +       | NADPH dehydrogenase NamA                                   |
| J4048_12285    | 2559585   | 2560359   | +       | alpha/beta fold hydrolase                                  |
| J4048_12290    | 2560408   | 2560558   | -       | 50S ribosomal protein L33                                  |
| J4048_12295    | 2560636   | 2561563   | -       | ribonuclease Z                                             |
| J4048_12300    | 2561771   | 2563241   | +       | glucose-6-phosphate dehydrogenase                          |
| J4048_12305    | 2563330   | 2564740   | -       | NADP-dependent phosphogluconate dehydrogenase              |
| J4048_12310    | 2564848   | 2566093   | -       | DNA polymerase IV                                          |
| J4048_12315    | 2566168   | 2566450   | +       | hypothetical protein                                       |
| J4048_12320    | 2566482   | 2567319   | +       | membrane protein insertase YidC                            |
| J4048_12325    | 2567432   | 2568548   | -       | M20/M25/M40 family metallo-hydrolase                       |

| J4048_12330           | 2568564          | 2570082          | -              | acyl-CoA carboxylase subunit beta                       |
|-----------------------|------------------|------------------|----------------|---------------------------------------------------------|
| J4048_12335           | 2570074          | 2570503          | -              | methyalmalonyl-CoA epimerase                            |
| J4048_12340           | 2570596          | 2570692          | +              | stressosome-associated protein Prli42                   |
| J4048_12345           | 2570705          | 2571236          | -              | L,D-transpeptidase                                      |
| J4048_12350           | 2571306          | 2572260          | -              | aromatic acid exporter family protein                   |
| J4048_12355           | 2572336          | 2573059          | -              | amino acid ABC transporter ATP-binding protein          |
| J4048_12360           | 2573051          | 2573711          | -              | amino acid ABC transporter permease                     |
| J4048_12365           | 2573772          | 2574540          | -              | transporter substrate-binding domain-containing protein |
| J4048_12370           | 2574785          | 2575223          | -              | bacilliredoxin BrxB                                     |
| J4048_12375           | 2575401          | 2576298          | +              | YegS/Rv2252/BmrU family lipid kinase                    |
| <b>Cluster 11</b>     |                  |                  |                |                                                         |
| <b>Table of genes</b> | <b>locations</b> | <b>locations</b> | <b>strands</b> | <b>annotations of query cluster</b>                     |
| J4048_15715           | 3202696          | 3203248          | -              | cysteine hydrolase                                      |
| J4048_15720           | 3203344          | 3203743          | -              | YueI family protein                                     |
| J4048_15725           | 3203808          | 3204057          | -              | YueH family protein                                     |
| J4048_15730           | 3204129          | 3204351          | -              | spore germination protein                               |
| J4048_15735           | 3204412          | 3205519          | -              | AI-2E family transporter                                |
| J4048_15740           | 3205655          | 3205892          | -              | DUF2642 domain-containing protein                       |
| J4048_15745           | 3206029          | 3206560          | -              | HD domain-containing protein                            |
| J4048_15750           | 3206724          | 3207456          | -              | (S)-benzoin forming benzil reductase                    |
| J4048_15755           | 3207516          | 3207990          | -              | type VII secretion protein EssA                         |
| J4048_15760           | 3207997          | 3211114          | -              | type VII secretion protein EsaA                         |
| J4048_15765           | 3211110          | 3215586          | -              | type VII secretion protein EssC                         |
| J4048_15770           | 3215640          | 3216927          | -              | type VII secretion protein EssB                         |
| J4048_15775           | 3216941          | 3217181          | -              | EsaB/YukD family protein                                |
| J4048_15780           | 3217256          | 3217550          | -              | WXG100 family type VII secretion target                 |
| J4048_15785           | 3217865          | 3219095          | +              | PucR family transcriptional regulator                   |
| J4048_15790           | 3219198          | 3220329          | +              | alanine dehydrogenase                                   |
| J4048_15795           | 3220446          | 3221124          | +              | YukJ family protein                                     |
| J4048_15800           | 3221168          | 3221384          | -              | MbtH family protein                                     |
| J4048_15805           | 3221402          | 3228530          | -              | amino acid adenylation domain-containing protein        |
| J4048_15810           | 3228544          | 3229471          | -              | isochorismatase                                         |
| J4048_15815           | 3229488          | 3231114          | -              | (2,3-dihydroxybenzoyl)adenylate synthase                |
| J4048_15820           | 3231132          | 3232329          | -              | isochorismate synthase Dhbc                             |
| J4048_15825           | 3232352          | 3233138          | -              | 2,3-dihydro-2,3-dihydroxybenzoate dehydrogenase         |
| J4048_15830           | 3233273          | 3234143          | -              | alpha/beta hydrolase                                    |
| J4048_15835           | 3234318          | 3234915          | -              | sulfite oxidase-like oxidoreductase                     |
| J4048_15840           | 3235014          | 3235608          | +              | biotin transporter BioY                                 |
| J4048_15845           | 3235654          | 3236983          | -              | TRAP transporter large permease subunit                 |
| J4048_15850           | 3237115          | 3238606          | -              | leucyl aminopeptidase                                   |
| J4048_15855           | 3238753          | 3239230          | +              | divergent PAP2 family protein                           |
| J4048_15860           | 3239259          | 3239877          | -              | 3D domain-containing protein                            |
| J4048_15865           | 3240001          | 3240322          | -              | YuiB family protein                                     |
| J4048_15870           | 3240390          | 3240516          | -              | YuiA family protein                                     |
| J4048_15875           | 3240689          | 3241910          | -              | NAD(P)/FAD-dependent oxidoreductase                     |
| J4048_15880           | 3242221          | 3243217          | +              | ferredoxin--NADP reductase 2                            |
| J4048_15885           | 3243257          | 3243401          | -              | hypothetical protein                                    |
| J4048_15890           | 3243618          | 3244599          | +              | GMP reductase                                           |
| J4048_15895           | 3244661          | 3244883          | -              | hypothetical protein                                    |

|                       |                  |                  |                |                                                                   |
|-----------------------|------------------|------------------|----------------|-------------------------------------------------------------------|
| J4048_15900           | 3244899          | 3245427          | -              | stage II sporulation protein M                                    |
| J4048_15905           | 3245423          | 3246128          | -              | ABC transporter ATP-binding protein                               |
| J4048_15910           | 3246120          | 3247776          | -              | hypothetical protein                                              |
| J4048_15915           | 3247858          | 3248194          | -              | uberolysin/carnocyclin family circular bacteriocin                |
| J4048_15920           | 3248261          | 3248834          | -              | hypothetical protein                                              |
| J4048_15925           | 3249093          | 3249621          | -              | GNAT family N-acetyltransferase                                   |
| J4048_15930           | 3249995          | 3250757          | +              | SDR family NAD(P)-dependent oxidoreductase                        |
| J4048_15935           | 3250900          | 3250975          | -              | iron-sulfur cluster assembly accessory protein                    |
| J4048_15940           | 3251019          | 3251385          | -              | hypothetical protein                                              |
| J4048_15945           | 3251836          | 3252199          | -              | iron-sulfur cluster assembly accessory protein                    |
| J4048_15950           | 3252277          | 3253132          | -              | diaminopimelate epimerase                                         |
| <b>Cluster 12</b>     |                  |                  |                |                                                                   |
| <b>Table of genes</b> | <b>locations</b> | <b>locations</b> | <b>strands</b> | <b>annotations of query cluster</b>                               |
| J4048_17470           | 3548731          | 3549091          | -              | phage holin family protein                                        |
| J4048_17475           | 3549091          | 3549286          | -              | PspC domain-containing protein                                    |
| J4048_17480           | 3549290          | 3550388          | -              | DUF4097 domain-containing protein                                 |
| J4048_17485           | 3550412          | 3550739          | -              | hypothetical protein                                              |
| J4048_17490           | 3550936          | 3551197          | +              | hypothetical protein                                              |
| J4048_17495           | 3551222          | 3554096          | -              | excinuclease ABC subunit UvrA                                     |
| J4048_17500           | 3554103          | 3556089          | -              | excinuclease ABC subunit B                                        |
| J4048_17505           | 3556264          | 3556501          | -              | CsbA family protein                                               |
| J4048_17510           | 3556801          | 3559303          | +              | phosphotransferase                                                |
| J4048_17515           | 3559374          | 3559998          | +              | TetR/AcrR family transcriptional regulator                        |
| J4048_17520           | 3559970          | 3561308          | +              | MFS transporter                                                   |
| J4048_17525           | 3561893          | 3562667          | -              | thioesterase                                                      |
| J4048_17530           | 3562717          | 3563788          | -              | DUF3810 domain-containing protein                                 |
| J4048_17535           | 3563873          | 3564935          | -              | saccharopine dehydrogenase NADP-binding domain-containing protein |
| J4048_17540           | 3564967          | 3566710          | -              | ABC transporter ATP-binding protein                               |
| J4048_17545           | 3566906          | 3581303          | -              | amino acid adenylation domain-containing protein                  |
| J4048_17550           | 3581314          | 3598429          | -              | amino acid adenylation domain-containing protein                  |
| J4048_17555           | 3598935          | 3599395          | -              | SDR family NAD(P)-dependent oxidoreductase                        |
| J4048_17560           | 3599467          | 3599629          | -              | hypothetical protein                                              |
| J4048_17565           | 3600253          | 3600394          | -              | hypothetical protein                                              |
| J4048_17570           | 3600546          | 3601737          | -              | serine protease                                                   |
| J4048_17575           | 3601811          | 3602165          | -              | Swarming motility protein SwrAA                                   |
| J4048_17580           | 3602537          | 3603938          | -              | S41 family peptidase                                              |
| J4048_17585           | 3604105          | 3605512          | +              | right-handed parallel beta-helix repeat-containing protein        |
| J4048_17590           | 3605558          | 3606449          | -              | permease-like cell division protein FtsX                          |
| J4048_17595           | 3606441          | 3607128          | -              | cell division ATP-binding protein FtsE                            |
| J4048_17600           | 3607346          | 3607688          | -              | cytochrome c                                                      |
| J4048_17605           | 3607723          | 3608572          | -              | YitT family protein                                               |
| J4048_17610           | 3608740          | 3609842          | -              | peptide chain release factor 2                                    |
| J4048_17615           | 3609916          | 3612442          | -              | preprotein translocase subunit SecA                               |
| J4048_17620           | 3612607          | 3613174          | -              | ribosome-associated translation inhibitor RaiA                    |
| J4048_17625           | 3613368          | 3613746          | -              | hypothetical protein                                              |
| J4048_17630           | 3613755          | 3614100          | -              | flagella biosynthesis regulatory protein FliT                     |
| J4048_17635           | 3614099          | 3614501          | -              | flagellar export chaperone FliS                                   |
| J4048_17640           | 3614520          | 3616041          | -              | flagellar hook-associated protein 2                               |
| J4048_17645           | 3616291          | 3617446          | -              | flagellin                                                         |



| J4048_17650           | 3617590           | 3617815           | -               | carbon storage regulator CsrA                       |
|-----------------------|-------------------|-------------------|-----------------|-----------------------------------------------------|
| J4048_17655           | 3617808           | 3618240           | -               | flagellar assembly protein FliW                     |
| <b>Cluster 13</b>     |                   |                   |                 |                                                     |
| <b>Table of genes</b> | <b>locat-ions</b> | <b>locat-ions</b> | <b>stran ds</b> | <b>annotations of query cluster</b>                 |
| J4048_18730           | 3823751           | 3823940           | +               | 4-oxalocrotonate tautomerase                        |
| J4048_18735           | 3823977           | 3824397           | -               | MarR family transcriptional regulator               |
| J4048_18740           | 3824767           | 3826162           | +               | amino acid permease                                 |
| J4048_18745           | 3826227           | 3826728           | -               | YwgA family protein                                 |
| J4048_18750           | 3826767           | 3828069           | -               | HD domain-containing protein                        |
| J4048_18755           | 3828228           | 3828453           | -               | DUF1450 domain-containing protein                   |
| J4048_18760           | 3828655           | 3829429           | +               | RsfA family transcriptional regulator               |
| J4048_18765           | 3829689           | 3830004           | +               | PadR family transcriptional regulator               |
| J4048_18770           | 3830004           | 3830559           | +               | DUF1700 domain-containing protein                   |
| J4048_18775           | 3830656           | 3831577           | +               | ATP-binding cassette domain-containing protein      |
| J4048_18780           | 3831573           | 3832527           | +               | ABC transporter permease                            |
| J4048_18785           | 3832516           | 3833353           | -               | hypothetical protein                                |
| J4048_18790           | 3833343           | 3834141           | -               | hypothetical protein                                |
| J4048_18795           | 3834109           | 3835033           | -               | hypothetical protein                                |
| J4048_18800           | 3835081           | 3835261           | -               | hypothetical protein                                |
| J4048_18805           | 3835414           | 3836278           | -               | lipoate--protein ligase family protein              |
| J4048_18810           | 3836324           | 3837224           | -               | LysR family transcriptional regulator               |
| J4048_18815           | 3837339           | 3838317           | +               | putative sulfate exporter family transporter        |
| J4048_18820           | 3838354           | 3839326           | -               | phosphate acetyltransferase                         |
| J4048_18825           | 3839583           | 3840348           | +               | heme-dependent peroxidase                           |
| J4048_18830           | 3840467           | 3841247           | +               | SDR family oxidoreductase                           |
| J4048_18835           | 3841263           | 3842463           | -               | pyridoxal phosphate-dependent aminotransferase      |
| J4048_18840           | 3842475           | 3843657           | -               | MFS transporter                                     |
| J4048_18845           | 3843653           | 3845072           | -               | ATP-grasp domain-containing protein                 |
| J4048_18850           | 3845089           | 3845851           | -               | dihydroantcapsin 7-dehydrogenase                    |
| J4048_18855           | 3845847           | 3846558           | -               | cupin domain-containing protein                     |
| J4048_18860           | 3846547           | 3847162           | -               | bacilysin biosynthesis protein BacA                 |
| J4048_18865           | 3847322           | 3848561           | -               | MFS transporter                                     |
| J4048_18870           | 3848783           | 3849986           | +               | multidrug efflux MFS transporter                    |
| J4048_18875           | 3850017           | 3851436           | -               | amino acid permease                                 |
| J4048_18880           | 3851460           | 3853143           | -               | M20/M25/M40 family metallo-hydrolase                |
| J4048_18885           | 3853214           | 3854762           | -               | L-glutamate gamma-semialdehyde dehydrogenase        |
| J4048_18890           | 3854969           | 3856256           | -               | Glu/Leu/Phe/Val dehydrogenase                       |
| J4048_18895           | 3856441           | 3856903           | -               | hypothetical protein                                |
| J4048_18900           | 3857118           | 3857574           | -               | dTDP-4-dehydrorhamnose 3,5-epimerase family protein |
| J4048_18905           | 3857570           | 3858419           | -               | dTDP-4-dehydrorhamnose reductase                    |
| J4048_18910           | 3858439           | 3859387           | -               | dTDP-glucose 4,6-dehydratase                        |
| J4048_18915           | 3859389           | 3860127           | -               | NTP transferase domain-containing protein           |
| J4048_18920           | 3860154           | 3861159           | -               | spore coat protein                                  |
| J4048_18925           | 3861160           | 3861901           | -               | spore coat protein                                  |
| J4048_18930           | 3861893           | 3863015           | -               | N-acetylneuraminate synthase family protein         |
| J4048_18935           | 3863014           | 3863878           | -               | GNAT family N-acetyltransferase                     |
| J4048_18940           | 3863878           | 3865048           | -               | DegT/DnrJ/EryC1/StrS family aminotransferase        |
